# Supplementary material for: A combustion method to synthesize nanoporous graphene
Source: Royal Society of Chemistry journal article supplement (doi:10.1039/c7ra13568h), 2018-01-01
Supplement: c7ra13568h1.pdf [file c7ra13568h1.pdf]

**Supporting Online Material for  
A combustion method for synthesizing nanoporous graphene**

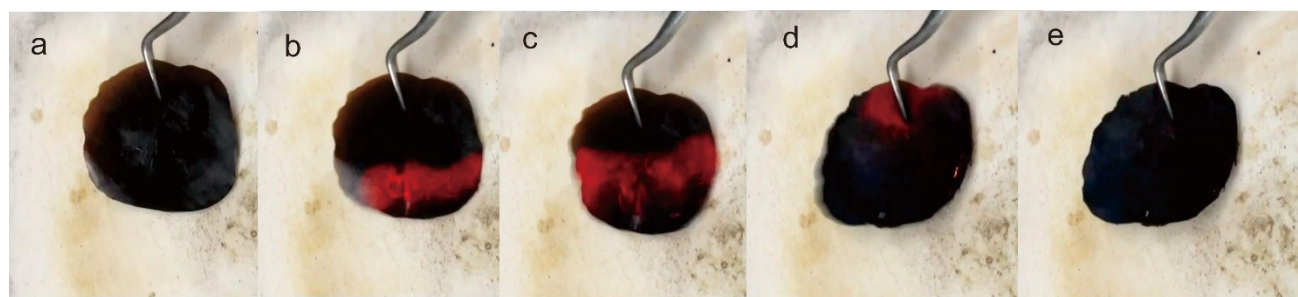

**Fig. S.I.1-** Optical photos of the combustion and expansion process of GOP at 300 °C. Graph (a) is the brown color GOP before contacting the hot heating plate, graph (b)-(d) are the process of combustion, graph (e) is the gained black fluffy porous RGO.
